# Supplementary material
Source: publisher figshare collection journal article supplement (https://karger.figshare.com/ndownloader/files/8705509)
Supplement: Supplementary file 1 [file 8705509]

4621288269

Day

|  |  |
|--|--|
|  |  |
|--|--|

Month

|  |  |
|--|--|
|  |  |
|--|--|

Year

|  |  |  |  |
|--|--|--|--|
|  |  |  |  |
|--|--|--|--|

ID

|  |  |  |  |  |
|--|--|--|--|--|
|  |  |  |  |  |
|--|--|--|--|--|

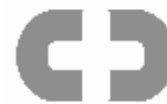**ULLEVÅL**  
University Hospital

## QUESTIONNAIRE FOR PATIENTS WITH MYASTHENIA GRAVIS

We want to learn more about the disease myasthenia gravis (myasthenia), and your answers to this questionnaire will give us a better understanding of the environmental and health factors that can influence the disease. Please answer the questions as well as you can, and take all the time you need. Your answers will be kept strictly confidential.

Thank you for your participation.

### How to fill out the questionnaire:

Please tick in the middle of the boxes and write with capital letters as shown below.

Yes:

|   |
|---|
| X |
|---|

|   |   |   |   |  |
|---|---|---|---|--|
| O | S | L | O |  |
|---|---|---|---|--|

No:

|   |
|---|
| X |
|---|

|   |   |   |   |  |
|---|---|---|---|--|
| O | S | L | O |  |
|---|---|---|---|--|

If you do not wish to answer the questionnaire, tick the boxes below and return the questionnaire to us. By doing this you will avoid receiving a reminder.

|  |
|--|
|  |
|--|

Woman

|  |
|--|
|  |
|--|

Man

Age

|  |  |
|--|--|
|  |  |
|--|--|

Years

I do not wish to answer the questionnaire 

|  |
|--|
|  |
|--|

□ Man

|  |  |
|--|--|
|  |  |
|--|--|

*Tick only one box*

☐ Single

*Tick one or more boxes*

Other relation ☐

☐ No

|  |  |
|--|--|
|  |  |
|--|--|

[illegible][illegible][illegible][illegible][illegible][illegible][illegible]

## BACKGROUND

### 7. What is the population of your municipality?

*tick only one box*

☐ 500 000 or more ☐ 100 000 - 500 000 ☐ 10 000 - 100 000 ☐ 1000 - 10 000 ☐ 1000 or less

### 8. Distance to the closest hospital you attend for follow-up for myasthenia

*tick only one box*

☐ 0 -10 km ☐ 10 - 50 km ☐ more than 50 km

## FINANCIAL SITUATION

### 9 a) Are you receiving any of the following benefits? *Tick one or more boxes*

|                                          |                          |                                 |                          |
|------------------------------------------|--------------------------|---------------------------------|--------------------------|
| Sicknes/rehabilitation benefit/ Sick pay | <input type="checkbox"/> | I am not receiving any benefits | <input type="checkbox"/> |
| Benefit under vocational rehabilitation  | <input type="checkbox"/> |                                 |                          |
| Disability pension                       | <input type="checkbox"/> |                                 |                          |
| Old age pension                          | <input type="checkbox"/> |                                 |                          |
| Welfare benefit                          | <input type="checkbox"/> |                                 |                          |
| Unemployment benefit                     | <input type="checkbox"/> |                                 |                          |
| Survivor`s benefit                       | <input type="checkbox"/> |                                 |                          |
| Other benefit                            | <input type="checkbox"/> |                                 |                          |

### 9 b) During the past year, has the houshold had difficulty meeting running expenses for items like food, transport, housing?

*Tick only one box*

☐ Yes, often ☐ Yes, sometimes ☐ Yes, occationally ☐ No, never

## EDUCATION AND EMPLOYMENT

### 10. Indicate your level of education *Tick only one box*

- ☐ Primary school or lower (less than 7 years)
- ☐ Lower secondary school (7-10 years)
- ☐ Upper secondary school/vocational training (10-13 years)
- ☐ College/ university less than 4 years
- ☐ College/ university 4 or more years

### 11. What is your current work situation? *Tick only one box*

- |                                                     |                                                    |
|-----------------------------------------------------|----------------------------------------------------|
| <input type="checkbox"/> Paid employment            | <input type="checkbox"/> Receiving social security |
| <input type="checkbox"/> Self-employed              | <input type="checkbox"/> Pensioner                 |
| <input type="checkbox"/> Full-time work in the home | <input type="checkbox"/> Military service          |
| <input type="checkbox"/> Unemployed/laid off        | <input type="checkbox"/> Education                 |
- If you currently are doing education,  
please go directly to question 17**

### 12. What is your current or previous occupation? *Answer even if you are receiving social security or pension* *Tick only one box*

- ☐ Management, politics (manager, politician)
- ☐ Occupation requiring higher degree (engineer, doctor, lawyer, economist, secondary school teacher)
- ☐ Occupation requiring lower degree, technical qualification (nurse, police officer, school teacher)
- ☐ Office staff, customer service (secretary, working with accounts, receptionist)
- ☐ Sales, service occupation, care services (dealing with clients, care worker, hairdresser)
- ☐ Agriculture, forestry, fisheries
- ☐ Trade (mechanic, electrician, carpenter, housepainter, baker, butcher)
- ☐ Processing industry (machine operator, transport worker)
- ☐ Military occupation (recruit, non-commissioned officer, unspecified)
- ☐ Occupation not requiring qualifications (cleaner, messenger, refuse collector)

## EDUCATION AND EMPLOYMENT

**13 a) Has myasthenia influenced your choice of occupation?**

☐ Yes    ☐ No    ☐ Not relevant    ☐ Don't know

**13 b) Have you had to change your occupation because of myasthenia?**

☐ Yes    ☐ No    ☐ Not relevant    ☐ Don't know

**13 c) Have you had to stop working because of myasthenia?**

☐ Yes    ☐ No    ☐ Not relevant    ☐ Don't know

**14. Were you in paid employment before you developed myasthenia?**

☐ Yes, full time    ☐ Yes, part time    ☐ No

**15. Are you currently in paid employment?**

☐ Yes, full time    ☐ Yes, part time    ☐ No    *If no, go to question 18*

**16 a) During the last 12 months have you considered changing your occupation/job because of myasthenia?**

☐ Yes    ☐ No    ☐ Don't know

**16 b) During the last 12 months have you had to take sick leave because of myasthenia?**

☐ Yes    ☐ No

**If yes, for how long altogether?**

☐ 2 weeks or less

☐ 2 - 8 weeks

☐ More than 8 weeks

## EDUCATION AND EMPLOYMENT

**17. Questions regarding your education.** Answer only if you are currently doing education

**17 a) Has myasthenia influenced your choice of education?**

☐ Yes    ☐ No    ☐ Not relevant    ☐ Don't know

**17 b) Have you had to change your education because of myasthenia?**

☐ Yes    ☐ No    ☐ Not relevant    ☐ Don't know

**17 c) Have you had to quit your education because of myasthenia?**

☐ Yes    ☐ No    ☐ Not relevant    ☐ Don't know

**17 d) During the last 12 months have you considered changing type of education because of myasthenia?**

☐ Yes    ☐ No    ☐ Don't know

**17 e) During the last 12 months did you have time off from school because of myasthenia?**

☐ Yes    ☐ No

**If yes, for how long altogether?**

☐ 2 weeks or less

☐ 2 - 8 weeks

☐ More than 8 weeks

# MYASTHENIA

18 a) How old were you when you first noticed symptoms of myasthenia?

|  |  |
|--|--|
|  |  |
|--|--|

18 b) When you first noticed myasthenia symptoms, were you: *Tick one box on each line*

Pregnant or had recently given birth?(women only) ☐ Yes ☐ No ☐ Don't know

Undergoing medical treatment for another illness? ☐ Yes ☐ No ☐ Don't know

Recently operated on? ☐ Yes ☐ No ☐ Don't know

Recently diagnosed with another disease? ☐ Yes ☐ No ☐ Don't know

Affected by some other event? ☐ Yes ☐ No ☐ Don't know

If answer "other event", please add short explanation

|  |
|--|
|  |
|--|

19. How old were you when you were diagnosed with myasthenia by a doctor?

|  |  |
|--|--|
|  |  |
|--|--|

20. What was the name of the hospital or neurologist where you were diagnosed?

*Tick only one box*

☐ Hospital/out-patient clinic

☐ Neurologist, private practice

Name, hospital

|  |  |  |  |  |  |  |  |  |  |  |  |  |  |  |
|--|--|--|--|--|--|--|--|--|--|--|--|--|--|--|
|  |  |  |  |  |  |  |  |  |  |  |  |  |  |  |
|--|--|--|--|--|--|--|--|--|--|--|--|--|--|--|

Name, city

|  |  |  |  |  |  |  |  |  |  |  |  |  |  |  |
|--|--|--|--|--|--|--|--|--|--|--|--|--|--|--|
|  |  |  |  |  |  |  |  |  |  |  |  |  |  |  |
|--|--|--|--|--|--|--|--|--|--|--|--|--|--|--|

21. Who follows up your myasthenia? *Tick only one box*

☐ Family doctor

☐ Neurologist

☐ Hospital doctor (not neurologist)

☐ Other doctor

# MYASTHENIA

**22. How often have you had check-ups with a neurologist for myasthenia in the past 2 years?**

Number of times

|  |  |
|--|--|
|  |  |
|--|--|

**23. How would you assess the follow-up by your doctor?** *Tick only one box*

☐ Poor      ☐ Medium      ☐ Good

**24 a) Which myasthenia symptoms did you have when the disease started?**

*Tick one box on every line.*

**Yes = I had the symptom**

**No = I did not have the symptom**

**Don't know = I don't know/can't remember whether I had the symptom**

|                                                                        | Yes                      | No                       | Don't know               |
|------------------------------------------------------------------------|--------------------------|--------------------------|--------------------------|
| Weak or droopy eyelids (eyelids hung down)                             | <input type="checkbox"/> | <input type="checkbox"/> | <input type="checkbox"/> |
| Double vision (I saw double)                                           | <input type="checkbox"/> | <input type="checkbox"/> | <input type="checkbox"/> |
| Weak hand/arm muscles (difficulty carrying heavy objects)              | <input type="checkbox"/> | <input type="checkbox"/> | <input type="checkbox"/> |
| Weak legs (difficulty managing stairs and/or walking longer distances) | <input type="checkbox"/> | <input type="checkbox"/> | <input type="checkbox"/> |
| Weak neck (difficulty holding your head up)                            | <input type="checkbox"/> | <input type="checkbox"/> | <input type="checkbox"/> |
| Weakness in face, cheeks or lips (difficulty whistling or smiling)     | <input type="checkbox"/> | <input type="checkbox"/> | <input type="checkbox"/> |
| Speech difficulties (slurred, unclear speech)                          | <input type="checkbox"/> | <input type="checkbox"/> | <input type="checkbox"/> |
| Chewing difficulties (difficulty chewing food)                         | <input type="checkbox"/> | <input type="checkbox"/> | <input type="checkbox"/> |
| Difficulty swallowing (difficulty swallowing food and drink)           | <input type="checkbox"/> | <input type="checkbox"/> | <input type="checkbox"/> |
| Breathing difficulties (laboured breathing on slight effort)           | <input type="checkbox"/> | <input type="checkbox"/> | <input type="checkbox"/> |

**24 b) On a scale of 1 to 10, how serious did you feel your symptoms were when the disease started?** *Tick only one box*

1 = very slight symptoms (did not affect daily life)

10= very serious symptoms (requiring hospitalisation)

1 2 3 4 5 6 7 8 9 10

Very slight symptoms Very serious symptoms



# MYASTHENIA

## 25 a) Which myasthenia symptoms have you had during the last 3 months?

*Tick one box on every line.*

**Yes = I had the symptom**

**No = I did not have the symptom**

**Don't know = I don't know/can't remember whether I had the symptom**

|                                                                        | Yes                      | No                       | Don't know               |
|------------------------------------------------------------------------|--------------------------|--------------------------|--------------------------|
| Weak or droopy eyelids (eyelids hung down)                             | <input type="checkbox"/> | <input type="checkbox"/> | <input type="checkbox"/> |
| Double vision (I saw double)                                           | <input type="checkbox"/> | <input type="checkbox"/> | <input type="checkbox"/> |
| Weak hand/arm muscles (difficulty carrying heavy objects)              | <input type="checkbox"/> | <input type="checkbox"/> | <input type="checkbox"/> |
| Weak legs (difficulty managing stairs and/or walking longer distances) | <input type="checkbox"/> | <input type="checkbox"/> | <input type="checkbox"/> |
| Weak neck (difficulty holding your head up)                            | <input type="checkbox"/> | <input type="checkbox"/> | <input type="checkbox"/> |
| Weakness in face, cheeks or lips (difficulty whistling or smiling)     | <input type="checkbox"/> | <input type="checkbox"/> | <input type="checkbox"/> |
| Speech difficulties (slurred, unclear speech)                          | <input type="checkbox"/> | <input type="checkbox"/> | <input type="checkbox"/> |
| Chewing difficulties (difficulty chewing food)                         | <input type="checkbox"/> | <input type="checkbox"/> | <input type="checkbox"/> |
| Difficulty swallowing (difficulty swallowing food and drink)           | <input type="checkbox"/> | <input type="checkbox"/> | <input type="checkbox"/> |
| Breathing difficulties (laboured breathing on slight effort)           | <input type="checkbox"/> | <input type="checkbox"/> | <input type="checkbox"/> |

## 25 b) On a scale of 1 to 10, how serious were your symptoms during the last 3 months and up to the present? *Tick only one box*

1 = very slight symptoms (did not affect daily life)

10= very serious symptoms (requiring hospitalisation)

|                          |                          |                          |                          |                          |                          |                          |                          |                          |                          |
|--------------------------|--------------------------|--------------------------|--------------------------|--------------------------|--------------------------|--------------------------|--------------------------|--------------------------|--------------------------|
| 1                        | 2                        | 3                        | 4                        | 5                        | 6                        | 7                        | 8                        | 9                        | 10                       |
| <input type="checkbox"/> |
| Very slight symptoms     |                          |                          |                          |                          |                          |                          |                          |                          | Very serious symptoms    |

## 26. Have your myasthenia symptoms been worse during one or more periods since the disease started? *Tick only one box*

☐ Yes      ☐ No      ☐ Don't know      *If no or don't know go to question 29*

# MYASTHENIA

**27 a) Which myasthenia symptoms did you have during your worst period?**

*Tick one box on every line.*

**Yes = I had the symptom**

**No = I did not have the symptom**

**Don't know = I don't know/can't remember whether I had the symptom**

|                                                                        | Yes                      | No                       | Don't know               |
|------------------------------------------------------------------------|--------------------------|--------------------------|--------------------------|
| Weak or droopy eyelids (eyelids hung down)                             | <input type="checkbox"/> | <input type="checkbox"/> | <input type="checkbox"/> |
| Double vision (I saw double)                                           | <input type="checkbox"/> | <input type="checkbox"/> | <input type="checkbox"/> |
| Weak hand/arm muscles (difficulty carrying heavy objects)              | <input type="checkbox"/> | <input type="checkbox"/> | <input type="checkbox"/> |
| Weak legs (difficulty managing stairs and/or walking longer distances) | <input type="checkbox"/> | <input type="checkbox"/> | <input type="checkbox"/> |
| Weak neck (difficulty holding your head up)                            | <input type="checkbox"/> | <input type="checkbox"/> | <input type="checkbox"/> |
| Weakness in face, cheeks or lips (difficulty whistling or smiling)     | <input type="checkbox"/> | <input type="checkbox"/> | <input type="checkbox"/> |
| Speech difficulties (slurred, unclear speech)                          | <input type="checkbox"/> | <input type="checkbox"/> | <input type="checkbox"/> |
| Chewing difficulties (difficulty chewing food)                         | <input type="checkbox"/> | <input type="checkbox"/> | <input type="checkbox"/> |
| Difficulty swallowing (difficulty swallowing food and drink)           | <input type="checkbox"/> | <input type="checkbox"/> | <input type="checkbox"/> |
| Breathing difficulties (laboured breathing on slight effort)           | <input type="checkbox"/> | <input type="checkbox"/> | <input type="checkbox"/> |

**27 b) On a scale of 1 to 10, how serious did you feel your symptoms were when the disease was at its worst?** *Tick only one box*

1 = very slight symptoms (did not affect daily life)

10= very serious symptoms (requiring hospitalisation)

1 2 3 4 5 6 7 8 9 10

Very slight symptoms Very serious symptoms

## MYASTHENIA

**28. Which of the following factors do you think could have made your myasthenia worse?** *Tick one or more boxes*

- An infection ☐
- Stress- mental ☐
- Stress- physical ☐
- Season (temperature) ☐
- Medication ☐
- Other factors ☐

None of these factors made my myasthenia worse ☐

If answer "other factors", please add short explanation

**29. Have you ever been admitted to hospital as an emergency patient because of myasthenia?**

☐ Yes, 1-2 times    ☐ Yes, 3-4 times    ☐ Yes, more than 5 times    ☐ No

**30. Do you know whether you have tested positive for antibodies?**

a) Antibodies against acetylcholine receptor (AchR)    ☐ Yes    ☐ No    ☐ Don't know

b) Antibodies against MuSK protein (anti-MuSK)    ☐ Yes    ☐ No    ☐ Don't know

**31. Have you had a thymectomy (had your thymus removed)?**    ☐ Yes    ☐ No

**32. Do any other members of your family have myasthenia?**    ☐ Yes    ☐ No

If yes, put a tick againsts the family member

☐ Father    ☐ Mother    ☐ Siblings    ☐ Grandparents    ☐ Cousins

# MYASTHENIA

**33 a) Have you ever had any of the following medicines or treatments for myasthenia at any time?** *Tick one or more boxes*

I have never taken medicines for myasthenia ☐ ( go to question 35 )

Pyridostigmine (Mestinon) ☐Prednisolone ☐Azathioprine (Imuran) ☐

Ciclosporine A (Sandimmun) ☐

Myclofenolate mofetil (CellCept) ☐Intravenous Immunglobolines ☐Plasmapheresis /plasma exchange ☐

Other treatment ☐

*If answer "other treatment", please add name of treatment*

**33 b) Which of the following medicines or treatments are you having now or have had in the last 3 months?** *Tick one or more boxes*

I have not been treated or medicated in the last 3 months ☐

Pyridostigmine (Mestinon) ☐Prednisolone ☐Azathioprine (Imuran) ☐

Ciclosporine A (Sandimmun) ☐

Myclofenolate mofetil (CellCept) ☐Intravenous Immunglobolines ☐Plasmapheresis /plasma exchange ☐Other treatment ☐

*If answer "other treatment", please add name of treatment*

**34. Have you had to stop treatment or medication for myasthenia because of side effects?**

☐ Yes    ☐ No

If yes, treatment with:

[illegible]

# MYASTHENIA

**35. Are you in touch with any group or organisation for myasthenia patients?**

☐ Yes ☐ No

If Yes, name:

|  |  |  |  |  |  |  |  |  |  |  |  |  |  |  |  |  |  |  |  |
|--|--|--|--|--|--|--|--|--|--|--|--|--|--|--|--|--|--|--|--|
|  |  |  |  |  |  |  |  |  |  |  |  |  |  |  |  |  |  |  |  |
|--|--|--|--|--|--|--|--|--|--|--|--|--|--|--|--|--|--|--|--|

If No, would you like to get in touch with a group/organisation?

☐ Yes ☐ No

**36 a) How do you keep up to date on new information and treatment concerning myasthenia?** *Tick one or more boxes*

Doctor ☐ I don't keep up to date ☐

Internet ☐

Medical journals/reference books ☐

Patient groups/organisations ☐

Other ☐

**36 b) Are you satisfied with the information you receive?** *Tick only one box*

☐ Yes ☐ No ☐ Not relevant

## OTHER DISEASES

**37. Do you have any of the following diseases?** *Tick one or more boxes*

I have none of the diseases below ☐

- Type 1 diabetes ☐
- Rheumatoid arthritis ☐
- Coeliac disease ☐
- Systemic lupus erythematosus (SLE) ☐
- Crohn`s disease ☐
- Autoimmune hepatitis ☐
- Psoriasis ☐
- Asthma ☐
- Allergy ☐
- Cancer ☐
- Lung disease (not asthma) ☐
- Type 2 diabetes ☐
- Heart disease (heart failure) ☐
- High blood pressure ☐
- Mental health problems (anxiety, depression) ☐

### 38. Metabolism

**a) Have you ever been diagnosed with:**

*Tick one box on every line*

- |                          | Yes                      | No                       | Don` t know              |
|--------------------------|--------------------------|--------------------------|--------------------------|
| 1. Hyperthyroidism       | <input type="checkbox"/> | <input type="checkbox"/> | <input type="checkbox"/> |
| 2. Hypothyroidism        | <input type="checkbox"/> | <input type="checkbox"/> | <input type="checkbox"/> |
| 3. Goitre                | <input type="checkbox"/> | <input type="checkbox"/> | <input type="checkbox"/> |
| 4. Other thyroid disease | <input type="checkbox"/> | <input type="checkbox"/> | <input type="checkbox"/> |

If yes, how old were you when you were diagnosed the disease?   years

**b) Do you take or have you taken any of the following medicines:**

- |                   | Yes                      | No                       | Don` t know              |
|-------------------|--------------------------|--------------------------|--------------------------|
| Thyroxin, Levaxin | <input type="checkbox"/> | <input type="checkbox"/> | <input type="checkbox"/> |
| Neo-Mercazole     | <input type="checkbox"/> | <input type="checkbox"/> | <input type="checkbox"/> |

# HEALTH

39. Indicate your present weight:    kg

40. Indicate your present height:    cm

## 41. Other medicines

For how many months during the past 12 months did you use the following medicines? Put 0 if you did not use any of the medicines.

|                            |                      |                      |
|----------------------------|----------------------|----------------------|
| Pain-killers               | <input type="text"/> | <input type="text"/> |
| Sleeping pills             | <input type="text"/> | <input type="text"/> |
| Tranquilisers              | <input type="text"/> | <input type="text"/> |
| Antidepressants            | <input type="text"/> | <input type="text"/> |
| Medicine for allergy       | <input type="text"/> | <input type="text"/> |
| Medicine for asthma        | <input type="text"/> | <input type="text"/> |
| Medicine for heart disease | <input type="text"/> | <input type="text"/> |

## 42. Smoking

a) Do you smoke now? *Tick one box on every line*

|                                  |                              |                             |
|----------------------------------|------------------------------|-----------------------------|
| Cigarettes daily                 | <input type="checkbox"/> Yes | <input type="checkbox"/> No |
| Cigars/cigarillos daily          | <input type="checkbox"/> Yes | <input type="checkbox"/> No |
| A pipe daily                     | <input type="checkbox"/> Yes | <input type="checkbox"/> No |
| I smoke every other day          | <input type="checkbox"/> Yes | <input type="checkbox"/> No |
| I have <u>never</u> smoked daily | <input type="checkbox"/> Yes | <input type="checkbox"/> No |

b) If you have previously smoked daily, how long ago did you stop?

years

**HEALTH****43. Alcohol**

- a) Do you abstain completely from alcohol? ☐ Yes (go to question. 44) ☐ No

b) How many times a month do you drink alcohol?

|  |  |
|--|--|
|  |  |
|--|--|

Low-alcohol beer (less than 2 %) does not count. Put 0 if your answer is less than once a month.

c) How many glasses of beer, wine or spirits do you usually drink in the course of 2 weeks?

Enter the number of glasses. Low-alcohol beer does not count.  
Put 0 if you do not drink the type of alcohol

**Beer**

|  |  |
|--|--|
|  |  |
|--|--|

**Glasses****Wine**

|  |  |
|--|--|
|  |  |
|--|--|

**Glasses****Spirits**

|  |  |
|--|--|
|  |  |
|--|--|

**Glasses****44. How many cups of coffee/tea do you drink daily?**

Put 0 if you don't drink coffee/tea daily

**Number of cups of coffee:**

|  |  |
|--|--|
|  |  |
|--|--|

**Number of cups of tea:**

|  |  |
|--|--|
|  |  |
|--|--|

**45. Do you regularly take food supplements on a daily basis (e.g. cod liver oil, vitamins, mineral supplements)?** *Tick only one box*

☐ Yes, daily☐ Now and then☐ No



## HEALTH

### 46. How much physical activity have you had over the past year in your free time?

Think of a weekly average for the year, e.g. working out, exercise, walking to work.

*Tick one box on every line*

#### Hours per week

- |                                                 |                               |                                      |                              |                                    |
|-------------------------------------------------|-------------------------------|--------------------------------------|------------------------------|------------------------------------|
| Light exercise (no sweating/ no breathlessness) | <input type="checkbox"/> None | <input type="checkbox"/> Less than 1 | <input type="checkbox"/> 1-2 | <input type="checkbox"/> 3 or more |
| Hard exercise (sweating/ breathlessness)        | <input type="checkbox"/> None | <input type="checkbox"/> Less than 1 | <input type="checkbox"/> 1-2 | <input type="checkbox"/> 3 or more |

### 47. Physical activity at work. Answer only if you are employed.

**How would you describe your job?** *Tick only one box*

- ☐ Mostly sitting still (e.g. at a desk, assembling furniture)
- ☐ Requires a lot of walking (e.g. shop assistant, light industrial work)
- ☐ A lot of walking and lifting heavy objects (e.g. delivering mail, nursing, construction work)
- ☐ Heavy physical work (e.g. logging, agricultural work, heavy construction work)

### 48. Vaccination

**a) Did you follow the normal vaccination programmes as a child?**

- ☐ Yes    ☐ No    ☐ Don't know

**b) Have you been vaccinated since the age of 18?**

- ☐ Yes    ☐ No    ☐ Don't know

**MEN ONLY**

**49. How old were you (years) when you reached puberty?**

(voice breaking, growth of body hair, etc.)

years

**WOMEN ONLY**

**50. How old were you (years) when you had your first menstruation?**

years

put 0 if you have never menstruated

**51. If you are no longer menstruating, how old were you (years) when you stopped?**

years

put 0 if you are still menstruating

**Is other reason (e.g. hysterectomy, surgery) the cause of no longer menstruating?**

☐ Yes

☐ No

☐ Not relevant

**52. Are you pregnant?**

☐ Yes

☐ No

☐ Don't know

☐ Not relevant

**53 a) How many children have you had?** Put 0 if you have never had a child and go directly to question 54 on the next page

Number of children

**b) How old were you when your first child was born?**

**c) How old were you when your last child was born?**

**d) Were any of your children born with symptoms of myasthenia?**

☐ Yes

☐ No

☐ Don't know

**e) Were there complications at any of the births?**

☐ Yes

☐ No

☐ Don't know

## WOMEN ONLY

**54. Have you had any miscarriages?** Put 0 if you have not had any miscarriages

Number of miscarriages:

|  |  |
|--|--|
|  |  |
|--|--|

**55. Have you ever had treatment for infertility/IVF treatment?** ☐ Yes ☐ No

**56. Do you use/have you ever used the following medicines?** *Tick one box on every line*

Contraceptive pills/mini-pills/injection ☐ Now ☐ Before, not now ☐ Never

IUD/contraceptive coil ☐ Now ☐ Before, not now ☐ Never

Hormone therapy (Oestrogen) ☐ Now ☐ Before, not now ☐ Never

**57. If you are using/have used hormone therapy (the most common names are e.g. Cyclabil, Estraderm, Kilogest, Ovesterin) how long have you been using them?**

☐ Less than 1 year

☐ 1-5 years

☐ More than 5 years

**58. In what ways have the following factors affected the course of your myasthenia?**

*Tick one box on every line*

Change of life (menopause) ☐ not relevant ☐ better ☐ no change ☐ worse ☐ don't know

Menstruation ☐ not relevant ☐ better ☐ no change ☐ worse ☐ don't know

Pregnancy ☐ not relevant ☐ better ☐ no change ☐ worse ☐ don't know

First six months after giving birth ☐ not relevant ☐ better ☐ no change ☐ worse ☐ don't know

Hormonal contraceptives/ hormone therapy ☐ not relevant ☐ better ☐ no change ☐ worse ☐ don't know

THANK YOU FOR TAKING THE TIME TO ANSWER THE QUESTIONS

PLEASE ADD COMMENTS IF NEEDED
